# Supplementary material for: Comparative Analysis of P450 Signature Motifs EXXR and CXG in the Large and Diverse Kingdom of Fungi: Identification of Evolutionarily Conserved Amino Acid Patterns Characteristic of P450 Family
Source: PubMed Central journal article supplement (PMC3990721; doi:10.1371/journal.pone.0095616), 2014-04-17

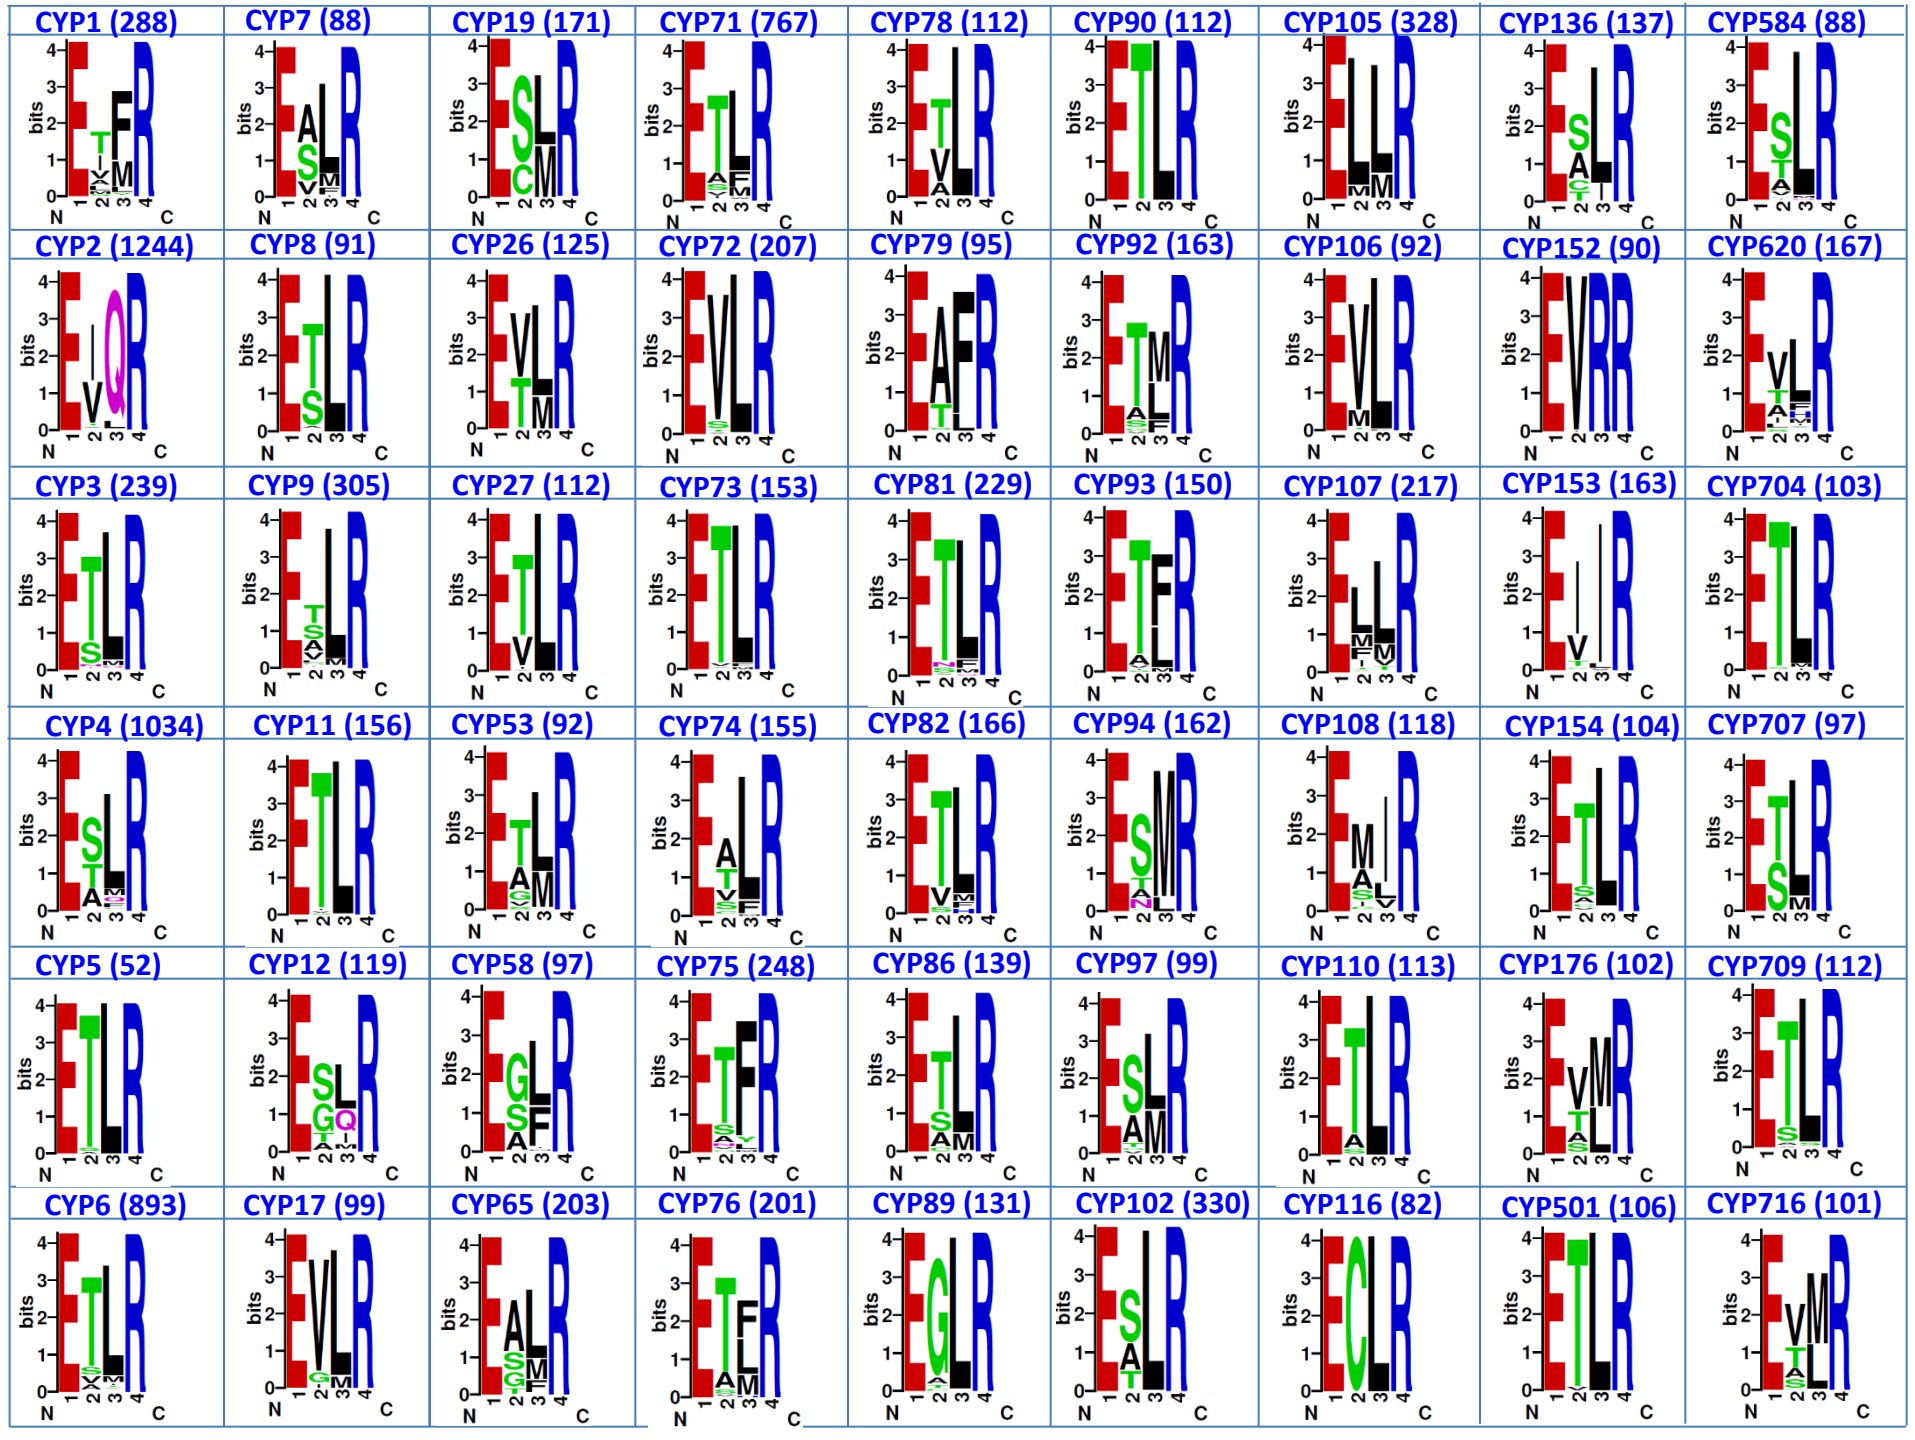

Supplement: pone.0095616.s001.pdf [file pone.0095616.s001.pdf]
